# Supplementary material for: Booster Immunization Improves Memory B Cell Responses in Older Adults Unresponsive to Primary SARS-CoV-2 Immunization
Source: MDPI journal article supplement (doi:10.3390/vaccines11071196), 2023-07-04
Supplement: s1 [file s1]

|                                   | All participants  | Adults (18-50)      | Older adults (50+) | Mann-Whitney<br>U test |
|-----------------------------------|-------------------|---------------------|--------------------|------------------------|
| <b>B cells before culture (%)</b> | 7.0 (1.6 - 19.2)  | 9.7 (4.1 - 17.2)    | 5.9 (1.6 - 19.2)   | ***                    |
| <b>B cells after culture (%)</b>  | 43.1 (3.1 - 88.5) | 59.8 (23.7 - 84.9)  | 35.9 (3.1 - 88.5)  | ***                    |
| <b>B cell fold change</b>         | 5.8 (0.7 - 17.0)  | 6.0 (1.7 - 9.8)     | 5.7 (0.7 - 17.0)   | ns                     |
| <b>Bmem before culture (%)</b>    | 0.3 (0.02 - 2.1)  | 0.3 (0.06 - 2.1)    | 0.3 (0.03 - 1.5)   | ns                     |
| <b>Bmem after culture (%)</b>     | 13.6 (0.4 - 55.9) | 25 (4.9 - 55.9)     | 11.85 (0.4 - 53.9) | ***                    |
| <b>Bmem fold change</b>           | 43 (1.4 - 391.5)  | 56.3 (17.3 - 391.5) | 35.7 (1.4 - 291.8) | ***                    |
| <b>PB before culture (%)</b>      | 0.02 (0 - 0.14)   | 0.02 (0 - 0.06)     | 0.02 (0 - 0.14)    | ns                     |
| <b>PB after culture (%)</b>       | 10.3 (0.1 - 43.3) | 19.4 (2.5 - 39.1)   | 7.9 (0.1 - 43.3)   | ***                    |
| <b>PB fold change</b>             | 439.0 (5.9 - inf) | 1027.3 (97.3 - inf) | 376.1 (5.9 - inf)  | ***                    |

**Supplementary table 1: B cell subset percentages before and after culture**

Samples from all timepoints are included. Bmem = memory B cells, PB = plasmablasts, all percentages are the taken as a percentage of the single cells in the sample and expressed as median (range). A Mann Whitney U test was carried out to compare adults and older adults. ns = not significant, \*\*\* =  $p < 0.001$
